# Supplementary material for: Homogeneous Fe2O3 coatings on carbon nanotube structures for supercapacitors
Source: Royal Society of Chemistry journal article supplement (doi:10.1039/c9dt04908h), 2020-01-01
Supplement: c9dt04908h1.pdf [file c9dt04908h1.pdf]

Supporting Information

**Homogeneous Fe<sub>2</sub>O<sub>3</sub> coatings on carbon nanotube structures for supercapacitors**

Pengmei Yu,<sup>a</sup> Mariona Coll,<sup>a\*</sup> Roger Amade,<sup>b,c</sup> Islam Alshaikh,<sup>b,c</sup>  
Fernando Pantoja-Suárez,<sup>b,c,d</sup> Esther Pascual,<sup>b,c</sup> José Luís Andújar,<sup>b,c</sup>  
and Enric Bertran Serra<sup>b,c</sup>

---

<sup>\*a</sup> Institut de Ciència de Materials de Barcelona (ICMAB-CSIC), Campus UAB 08193 Bellaterra (Barcelona) Spain. Email: mcoll@icmab.es; <sup>b</sup> Departament de Física Aplicada, Universitat de Barcelona, Martí i Franquès 1, 08028 Barcelona, Spain; <sup>c</sup> Institute of Nanoscience and Nanotechnology (IN2UB), Universitat de Barcelona, Avda. Joan XXIII, s/n, 08028 Barcelona, Spain; <sup>d</sup>Departamento de Materiales, Facultad de Ingeniería Mecánica, Escuela Politécnica Nacional, Ladrón de Guevara, E11-253, Quito, Ecuador

# 1 TEM-EDX Elemental mapping

In Figure S1 we display TEM images of ALD-30 nm  $\text{Fe}_2\text{O}_3$ @wpCNTs and ALD-6 nm  $\text{Fe}_2\text{O}_3$ @wpCNTs and their corresponding elemental mapping images and EDX sum spectra. The low amount of material in the 6 nm iron oxide-CNTs composite hinders the extraction of robust information from the elemental mapping. In contrast, the 30 nm composite show clear homogeneous iron oxide covering of the carbon nanotubes. From the EDX sum spectra it can be identified other elements such as Cu, Si, Ca and Cl that come from the TEM grid and sample manipulation during TEM sample preparation.

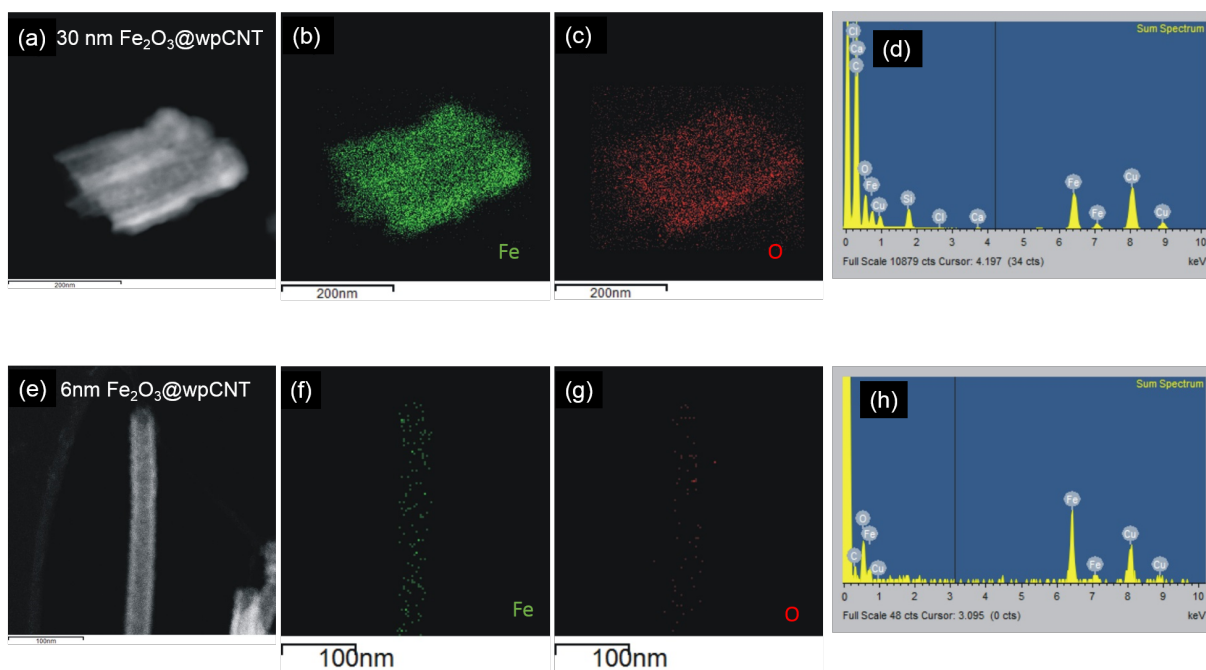

Figure S1: (a) TEM image of ALD-30 nm  $\text{Fe}_2\text{O}_3$ @wpCNTs, (b) elemental mapping of Fe  $K\alpha_1$  signal, (c) elemental mapping of O  $K\alpha_1$  signal, (d) EDX sum spectrum of the same region. (e) TEM image of ALD-6 nm  $\text{Fe}_2\text{O}_3$ @wpCNTs with the corresponding (f) elemental mapping of Fe  $K\alpha_1$  signal and (g) elemental mapping of O  $K\alpha_1$  signal. (h) EDX sum spectrum performed in (e).

## 2 XPS

The deconvolutions of high resolution XPS C 1s spectra of thinnest and continuous  $\text{Fe}_2\text{O}_3$  films coated CNTs samples reveal various carbon environments in the surface:  $\pi$ - $\pi$  interactions, C=O, C-O,  $sp^3$  carbon and  $sp^2$  carbon. See Figure S2. The areas of  $sp^3$  carbon and  $sp^2$  carbon in the deconvoluted spectra are tabulated in Table S1.

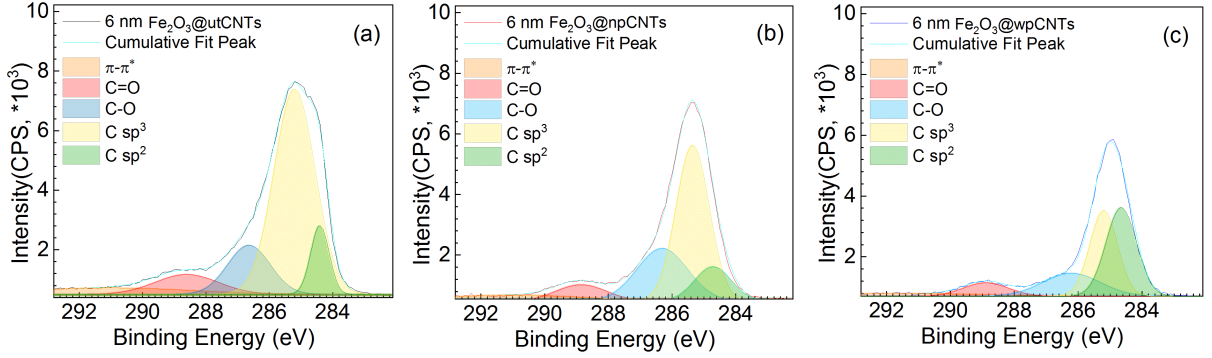

Figure S2: Deconvoluted XPS high resolution C 1s spectra of 6 nm  $\text{Fe}_2\text{O}_3$ @CNTs samples on (a) untreated CNTs, (b) nitrogen plasma CNTs, (c) water plasma CNTs.

Table S1: Relative area of  $sp^3$  C and  $sp^2$  C in the deconvoluted XPS C 1s spectra

| Sample                               | $sp^3$ C (area) | $sp^2$ C (area) |
|--------------------------------------|-----------------|-----------------|
| 6 nm $\text{Fe}_2\text{O}_3$ @utCNTs | 11210           | 1677            |
| 6 nm $\text{Fe}_2\text{O}_3$ @npCNTs | 6750            | 1650            |
| 6 nm $\text{Fe}_2\text{O}_3$ @wpCNTs | 3067            | 3500            |

### 3 GIXRD and XRR

GIXRD were carried out of the as-deposited iron oxide thin film on reference (100) silicon substrate. As is illustrated in Figure S3(a), the well-defined peaks in the diffraction curve can be readily indexed as pure phase  $\alpha$ -Fe<sub>2</sub>O<sub>3</sub> without any other impurities (Pdf card: 00-033-0664).

In Figure S3(b) we show a typical X-ray reflectivity curve of ALD-Fe<sub>2</sub>O<sub>3</sub> coated reference Si. By fitting the experimental data, the thickness of ALD-Fe<sub>2</sub>O<sub>3</sub> thin films is determined to be  $\sim 22.5$  nm.

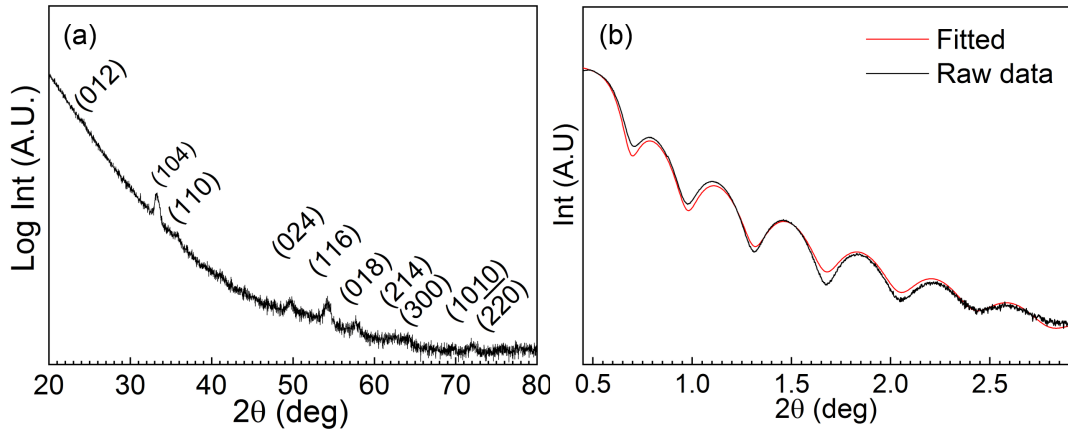

Figure S3: (a) GIXRD spectrum and (b) XRR raw data and fitted curves of ALD  $\alpha$ -Fe<sub>2</sub>O<sub>3</sub> thin films deposited at 250 °C on Si (100).
